# Supplementary material
Source: HighWire-hosted journal article supplement (http://www.qdcxjkg.com/highwire/filestream/113533/field_highwire_adjunct_files/0/Oxlade_ERJ_Supplement_R1__final.pdf)
Supplement: Oxlade_ERJ_Supplement_R1__final.pdf [file Oxlade_ERJ_Supplement_R1__final.pdf]

## Supplemental Methods and Results

### Supplemental Methods:

#### A) Detail on Treatment regimens:

#### ***Initial treatment regimens and outcomes with No DST:***

When DST was not performed, all patients received the WHO recommended standard initial regimen (2HRZE/4HR). During initial treatment new cases can cure, die or fail. Cases that cure can subsequently relapse. Default is not explicitly included as a separate treatment category; however treatment success rates have been lowered to take default rates into account. For HIV negative cases, except for those with underlying MDR, the proportion of the hypothetical cohort that die during initial treatment is based on the most recent WHO global data (1). HIV uninfected MDR cases have the same spontaneous cure rate as untreated cases - 25% (2), and annual mortality of 33% (3), since they are effectively untreated. Failure and relapse rates vary based on underlying drug resistance, according to a recent systematic review and meta-analysis of published randomized trials (4;5). Cases with underlying non MDR INH resistance or MDR have an increased likelihood of failure, relapse, death and acquired drug resistance as shown in table S1a.

Table S1a. Treatment outcomes after standardized initial treatment by underlying drug resistance

| Cure  |            |     | Fail |           |       | Relapse after cure |           |         | Death during initial treatment (6 months) |           |       |
|-------|------------|-----|------|-----------|-------|--------------------|-----------|---------|-------------------------------------------|-----------|-------|
| DS    | Mono INH R | MDR | DS   | Mono INHR | MDR   | DS                 | Mono INHR | MDR     | DS                                        | Mono INHR | MDR   |
| 96.2% | 93.4%      | 25% | 0.3% | 3.1%      | 58.5% | 3.1%               | 6.6%      | 2.5%/yr | 3.5%                                      | 3.5%      | 16.5% |

Sources of data for Drug sensitive and Mono INH treatment outcomes:

- Failure and Relapse (4) (5)
- Death: Adapted from : WHO Global Report 2009: Figure 1.26: Treatment outcomes for HIV+ and HIV-ve patients
  - Cure - complementary value (meaning 100% - [Failure + Death])

Sources of data for MDR treatment outcomes:

- Fail- complementary value
- Relapse (2;6)
- Death- as if untreated (data from pre-antibiotic era) (3)

- Cure -equivalent to spontaneous resolution)(2)

**Retreatment regimens and outcomes with No DST:**

If DST was not performed for cases who are smear positive at 5 months or relapses, all failures or relapses after treatment completion (regardless of underlying drug resistance) received WHO standardized retreatment ("Category 2" which is 2SHRZE/1HRZE/5HRE). Retreatment outcomes varied according to underlying drug resistance as shown in table S1b. Cases with mono INH resistance or MDR had worse retreatment outcomes. Failures and relapses of standard retreatment were assumed to receive no further treatment.

Methods Table S1b. Treatment outcomes after retreatment by underlying drug resistance

| Cure   |          |     | Fail  |          |     | Relapse after cure |          |         | Death during re-treatment (8 months) |          |     |
|--------|----------|-----|-------|----------|-----|--------------------|----------|---------|--------------------------------------|----------|-----|
| DS     | Mono INH | MDR | DS    | Mono INH | MDR | DS                 | Mono INH | MDR     | DS                                   | Mono INH | MDR |
| 93.7 % | 90.9%    | 0   | 0.3 % | 3.1 %    | 78% | 3.1%               | 6.6 %    | 2.5%/yr | 6%                                   | 6%       | 22% |

Sources of data: As per initial treatment

**Initial and retreatment regimens and outcomes following DST:**

If DST was performed, patients received an appropriate regimen once the DST results are available. Patients with drug sensitive (DS) TB continued the WHO recommended standard initial regimen. Patients with mono-INH resistant TB start (or restart-depending on the timing of DST) a 6 month regimen that was assumed to provide treatment outcomes equivalent to current standard therapy for drug sensitive cases. Patients with MDR received a standardized 24 month regimen (6 Amikacin-Cs-Eth-Lfx-PZA-EMB/ 18 Cs-Eth-Lfx-PZA-EMB). If DST was performed prior to or during initial treatment and mono INH is detected, then for those who relapse or fail after the regimen for INH resistant cases then they receive a standard retreatment regimen. Failures and relapses of standard retreatment were assumed to receive no further treatment. If MDR was previously detected and standardized MDR treatment given, patients will not have further treatment, even if they fail or relapse. The regimens given to different types of cases are summarized in table S2.

Methods Table S2: Summary of initial and retreatment regimens given to cases following DST

| Initial Drug resistance | Initial regimen | Retreatment regimen |
|-------------------------|-----------------|---------------------|
| Drug sensitive          | Standard WHO 6  | WHO Cat II          |

|                             |                                                                                                                            |                                                        |
|-----------------------------|----------------------------------------------------------------------------------------------------------------------------|--------------------------------------------------------|
|                             | month initial regimen.<br>2HRZE/4HR                                                                                        | retreatment regimen<br>2SHRZE/1HRZE/5HRE               |
| Detected Mono INH Resistant | Hypothetical regimen that would provide treatment outcomes equivalent to current standard therapy for drug sensitive cases | WHO Cat II<br>retreatment regimen<br>2SHRZE/1HRZE/5HRE |
| Detected MDR                | Standardized WHO MDR 24 month regimen. 6<br>Amikacin-Cs-Eth-Lfx-PZA-EMB/ 18<br>Cs-Eth-Lfx-PZA-EMB                          | No retreatment                                         |

Treatment outcomes for mono INH cases are assumed to be the same as those shown for drug sensitive cases given the WHO initial regimen (as per Table S1a). Retreatments are the same as those shown for mono-INH cases in table S1b. Treatment outcomes for MDR cases under appropriate therapy are summarized below in tables 3a.

Methods Table 3a. Treatment outcomes for detected MDR cases on standardized MDR treatment

| Cure | Fail | Relapse after cure | Death during treatment |
|------|------|--------------------|------------------------|
| 67%  | 20%  | 3%                 | 13%                    |

#### B) Detail on Acquisition of Drug Resistance:

Cases with undetected underlying drug resistance that are not treated appropriately can acquire additional drug resistance during each course of treatment (7). Data on rates of acquisition of drug resistance for cases undergoing initial or retreatment with different categories of underlying initial drug resistance are taken from recent systematic reviews (4;5;8). Tables S4 and S5 provide a summary of acquisition of drug resistance rates. Cases with undetected mono-INH resistance can acquire MDR during standardized initial and retreatment. If there is a delay in performing DST, or obtaining DST results, then cases can also acquire resistance during that interval while being treated with the standardized initial regimen, particularly if they have INH-mono-resistance. Other forms of drug

resistance are not considered, nor whether the resistance pattern of MDR-TB could be further worsened (amplified) by standardized initial and retreatment, since we are considering tests that detect INH and RIF only. These assumptions hold for all cases, regardless of HIV status.

Table S4 and S5: Rates of acquisition of drug resistance for cases undergoing initial or retreatment with different categories of underlying initial drug resistance.

Table S4a: Probability of *failures* acquiring drug resistance after a standardized 6 month regimen, by initial drug sensitivity were derived from published reviews(4;8) although the estimates in Table S4a come from additional secondary analysis that were not published.

| Initial drug resistance category | Probability of drug resistance amongst failures after treatment |             |         |
|----------------------------------|-----------------------------------------------------------------|-------------|---------|
|                                  | Sensitive (%)                                                   | Mono INH(%) | MDR (%) |
| Sensitive to all                 | 38.5%                                                           | 44.2%       | 17.3%   |
| Mono INH                         | -                                                               | 0%          | 100.0%  |

Table S4b: Probability of *relapses* having different types of drug resistance after a standardized 6 month regimen, by initial drug sensitivity - derived from published reviews(4;8), although these estimates come from additional secondary analysis that were not published.

| Initial drug resistance category | Probability of drug resistance amongst relapses after treatment |             |         |
|----------------------------------|-----------------------------------------------------------------|-------------|---------|
|                                  | Sensitive (%)                                                   | Mono INH(%) | MDR (%) |
| Sensitive to all                 | 94.1%                                                           | 3.7%        | 2.3%    |
| Mono INH                         | -                                                               | 100%        | 0%      |

Table S5a: Probability of *failures* with mono INH resistance (given regimen that provides treatment outcomes equivalent to current standard therapy for drug sensitive cases), or standard retreatment acquiring MDR (rates as per drug sensitive in table S4a)

| Initial drug resistance category       | Probability of drug resistance amongst failures after treatment |         |
|----------------------------------------|-----------------------------------------------------------------|---------|
|                                        | Mono INH(%)                                                     | MDR (%) |
| Mono INH ( getting appropriate regimen | 82.7%                                                           | 17.3%   |

|                               |  |  |
|-------------------------------|--|--|
| and standardized retreatment) |  |  |
|-------------------------------|--|--|

Table S5b: Probability of *relapses* with mono INH resistance, (given regimen that provides treatment outcomes equivalent to current standard therapy for drug sensitive cases), or standard retreatment acquiring MDR (rates as per drug sensitive in table S4a)

| Initial drug resistance category                                     | Probability of drug resistance amongst relapses after treatment |         |
|----------------------------------------------------------------------|-----------------------------------------------------------------|---------|
|                                                                      | Mono INH(%)                                                     | MDR (%) |
| Mono INH ( getting appropriate regimen and standardized retreatment) | 97.7%                                                           | 2.3%    |

C) Additional Detail on Health System costs (See Table S6 below)

Table S6: Additional detail on drug regimens and associated treatment and health system costs\*

| Regimen                  | Duration of Regimen | Regimen cost**                                                            | Single visit to doctor (2007 USD) | # of visits to doctor per regimen (1 per month) | Single DOT cost* (2007 USD) | # of DOT visits per regimen                                                                                                                                               | TOTAL health system cost |
|--------------------------|---------------------|---------------------------------------------------------------------------|-----------------------------------|-------------------------------------------------|-----------------------------|---------------------------------------------------------------------------------------------------------------------------------------------------------------------------|--------------------------|
| Initial standardized     | 6mth                | 2RHZE/4RH blisters = \$16.62                                              | \$22.70                           | 6                                               | \$7.52                      | =5 visit/wk for 8.7 wks<br>=3 visit /wk for 17.3 wks<br>Total=95 visits                                                                                                   | \$867                    |
| Retreatment standardized | 8mth                | 2RHZES/1RHZE/5RHE blisters, water for inj, 2 syringes = \$29.43           | \$22.70                           | 8                                               | \$7.52                      | =5 vst/wk for 8.7 wks (injectable)<br>=44 injectable visits<br><br>=5 visit /wk for 4.3 wks<br>=3 visit /wk for 21.7 wks<br>=87 non injectable visits<br>Total=131 visits | \$1527                   |
| INH-R regimen            | 6mth                | Initial regimen, with Levoquin (Lfx) <sup>†</sup> 2RLfxZE/4RLfx = \$43.33 | \$22.70                           | 6                                               | \$7.52                      | =5 visit /wk for 8.7 wks<br>=3 visit /wk for 17.3 wks<br><br>Total=95 visits                                                                                              | \$894                    |
| Standardized MDR         | 24mths              | 6Cm/18CsLfxEthPAS no syringe, no water for inj = \$2,118.79               | \$22.70                           | 24                                              | \$7.52                      | =5 visit /wk for 26 wks (injectable)<br>=130 injectable visits<br><br>=5 visit /wk for 70 wks<br>=350 non injectable visits<br>Total=480 visits                           | \$7250                   |

\*Hospitalization costs excluded- ambulatory costs only

\*\*Data obtained from survey of health system costs conducted in Rio De Janeiro, Brazil, 2007(9). Costs were originally obtained from direct surveys conducted in Brazil, but are assumed to be appropriate for South Africa, as the GDP per capita (PPP) for the two countries were almost identical in 2007 (10).

\*\*\*Drug regimen costs estimated using data from Global Drug Facility (GDF) ([www.stoptb.org/gdf/](http://www.stoptb.org/gdf/))

<sup>†</sup>In the absence of a known effective regimen for mono-INH resistant cases, for the purposes of costing, we assumed use of the regular standardized initial regimen, with a Quinolone (levofloxacin) replacement for isoniazid

Supplemental Figure S1: Illustration of progression through DST and treatment in model. Example of No DST strategy vs. Pre-treatment Rapid INH & RIF DST strategy

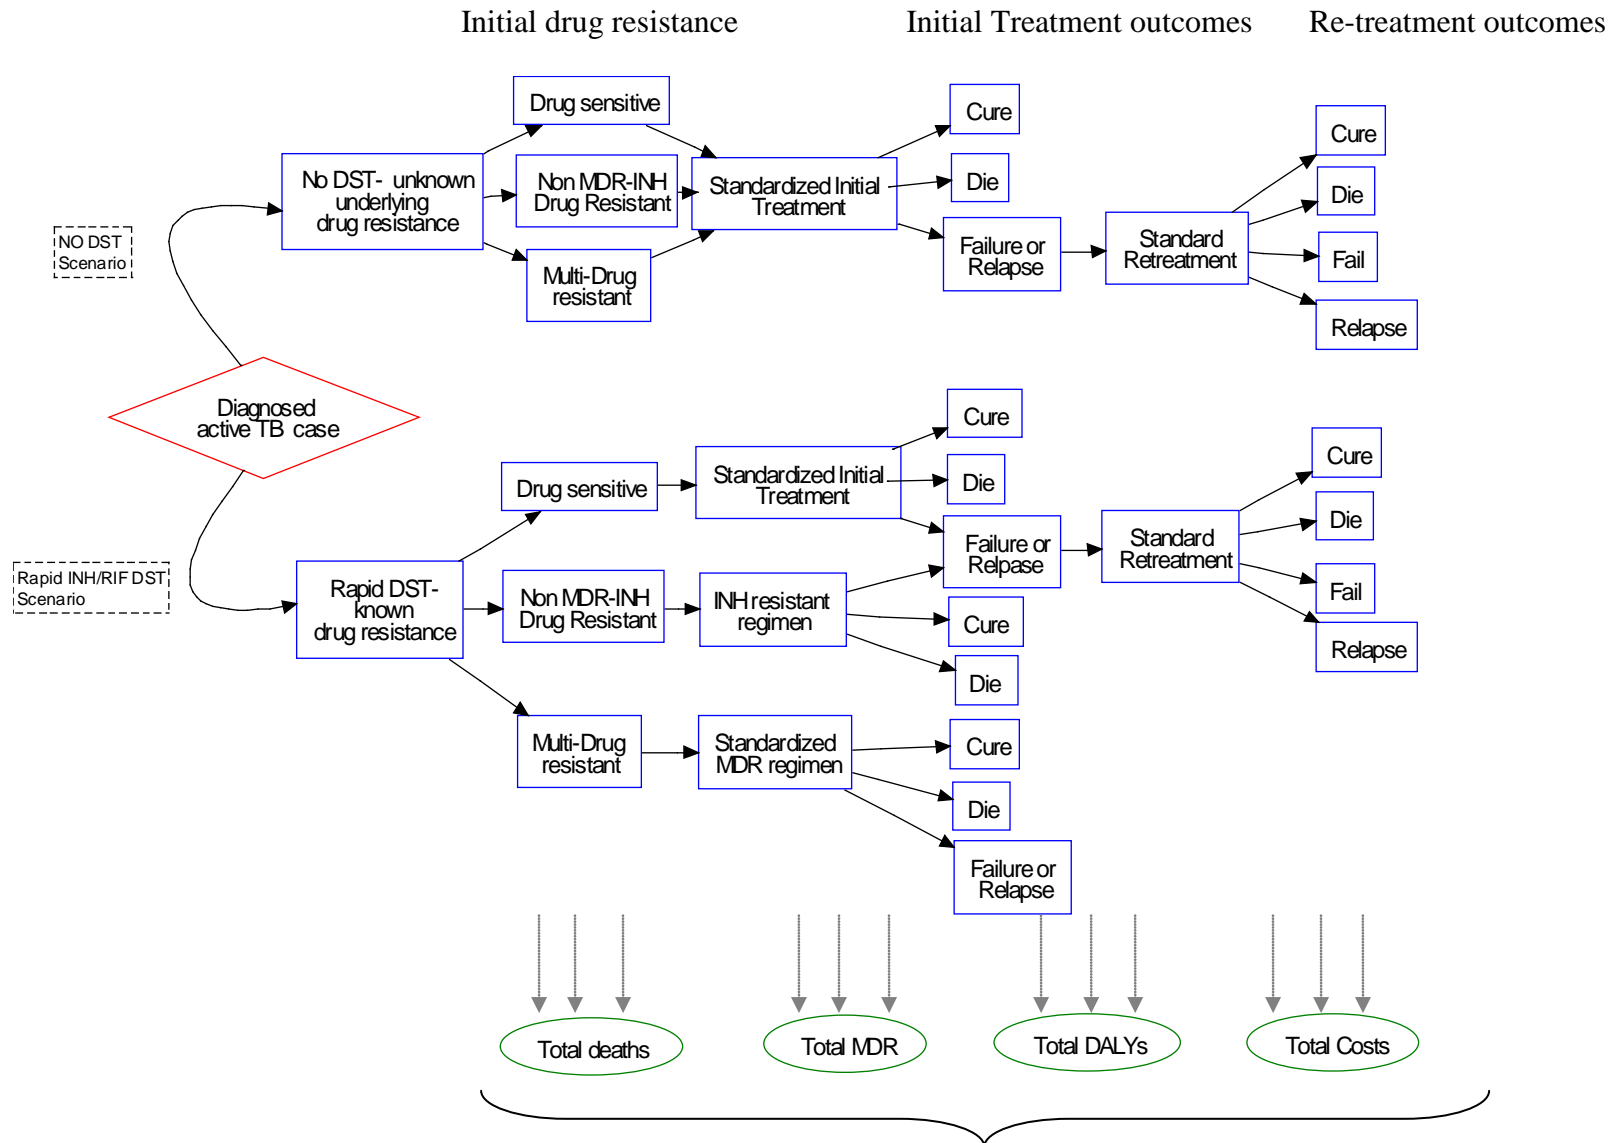

NOTE: Drug sensitive or non MDR- INH drug resistant may acquire drug resistance during initial and or retreatment.

SUM OF MODEL OUTPUT- Predicted for each scenario

Supplemental Results: Tables and Figures:

Supplemental Table S1. Sensitivity analysis- Cost of DST and drugs per 1000 new cases starting treatment: . Setting: (moderate drug resistance (non-MDR INH resistance of 5.8% and MDR of 2.1%)- no HIV)

|                                       | no<br>DST | solid<br>DST | rapid<br>R | rapid<br>HR | Rapid<br>HR @ 2<br>months | Rapid<br>HR @ 3<br>months | Rapid<br>HR @<br>5 mths<br>fail<br>only | Rapid<br>HR @<br>5 mths<br>fail<br>and<br>relapse |
|---------------------------------------|-----------|--------------|------------|-------------|---------------------------|---------------------------|-----------------------------------------|---------------------------------------------------|
| Baseline total Cost per case          | \$919     | \$1,073      | \$1,058    | \$1,054     | \$1,048                   | \$1,043                   | \$1,037                                 | \$1,039                                           |
| Cost per case- DST and drug cost only | \$18      | \$80         | \$97       | \$99        | \$69                      | \$64                      | \$60                                    | \$63                                              |
| % DST and drug only                   | 1.9%      | 7.4%         | 9.2%       | 9.4%        | 6.6%                      | 6.2%                      | 5.8%                                    | 6.0%                                              |





Supplemental Figure S2: Sensitivity analysis- Prevalence of HIV in TB cases. Setting: Moderate DR, Low HIV

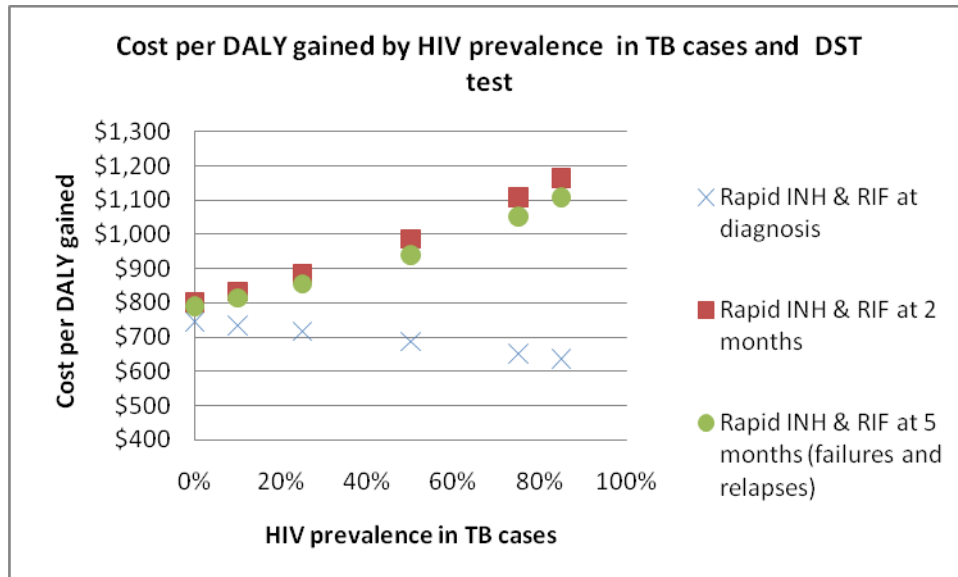

Supplemental Figure S3: Sensitivity analysis - Prevalence of initial MDR

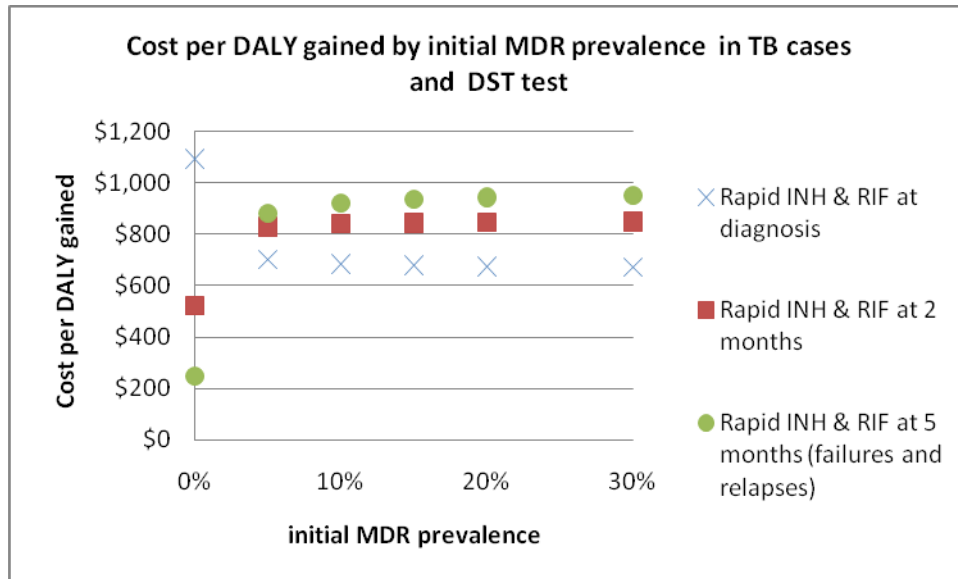

\* When the prevalence of initial MDR changes, it is absorbed by drug sensitive cases (i.e. prevalence of mono INH always remains at the base line level (5.8%))

Supplemental Figure S4. Sensitivity analysis - Prevalence of initial mono INH. Setting: Moderate DR, Low HIV

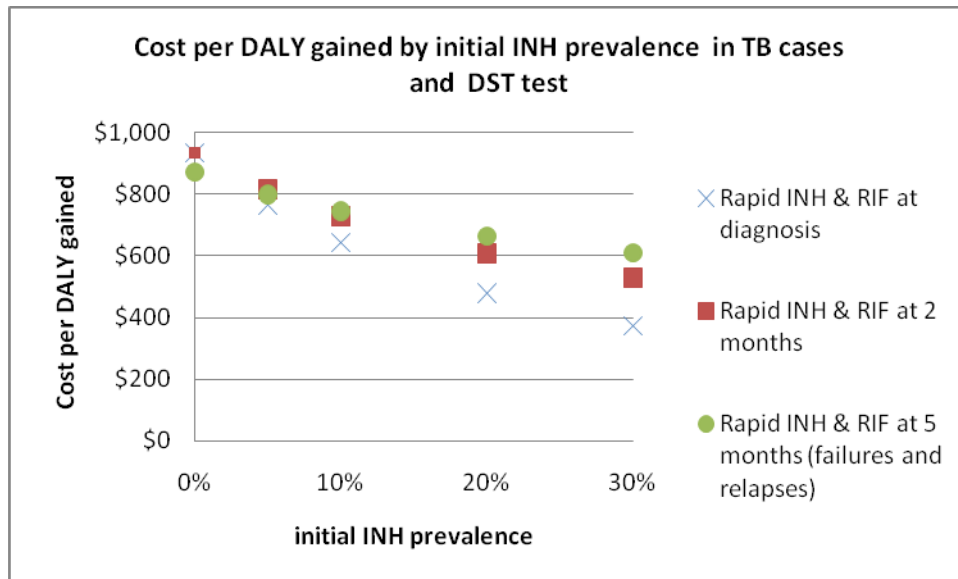

\*\* When the prevalence of initial INH changes, it is absorbed by drug sensitive cases (ie. prevalence of MDR remains at baseline level (2.1%))

Supplemental Figure S5. Sensitivity analysis - Cost of rapid test. Setting: Moderate DR, Low HIV

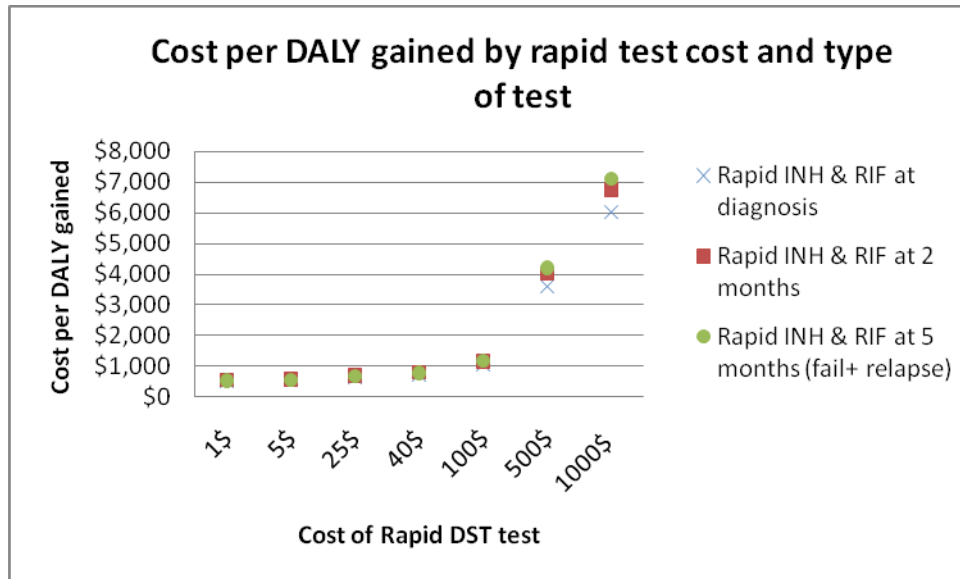



## Reference List

- (1) World Health Organization. Global Tuberculosis Control 2009: Epidemiology, Strategy, Financing. 2009.
- (2) Grzybowski S, Enarson DA. The fate of cases of pulmonary tuberculosis under various treatment programmes. *Bull Int Union Tuberc* 1978;53(2):70-4.
- (3) Rieder HL. Epidemiologic basis of tuberculosis control. First Edition, 1-162. 1999. Paris, France, International Union Against Tuberculosis and Lung Disease.
- (4) Menzies D, Benedetti A, Paydar A, Martin I, Royce S, Pai M et al. Effect of Duration and Intermittency of Rifampin on Tuberculosis Treatment Outcomes: A Systematic Review and Meta-Analysis. *PLOS Med* 2009;6(9):e1000146.
- (5) Menzies D, Benedetti A, Paydar A, Royce S, Pai M, Burman W et al. Standardized Treatment of Active Tuberculosis in Patients with Previous Treatment and/or with Mono-resistance to Isoniazid: A Systematic Review and Meta-analysis. *PLOS Med* 2009;6(9):e1000150.
- (6) Horwitz O. Public health aspects of relapsing tuberculosis. *Am Rev Respir Dis* 1969;99:183-93.
- (7) Rieder HL. Interventions for Tuberculosis Control and Elimination. International Union Against Tuberculosis and Lung Disease 2002.
- (8) Lew W, Oxlade O, Pai M, Martin D, Menzies D. Initial drug resistance and tuberculosis treatment outcomes: systematic review and meta-analysis. *Ann Intern Med* 2008;149(2):123-34.
- (9) Steffen R, Menzies D, Oxlade O, Pinto M, Zuleika de Castro A, Trajman A. Patients' costs and cost-effectiveness of tuberculosis in DOTS and non-DOTS facilities in Rio de Janeiro, Brazil. *PLOS ONE* 2010;
- (10) United Nations Statistics Division. United Nations Common Database. Web Database 2007; Available from: URL: [http://unstats.un.org/unsd/cdb/cdb\\_advanced\\_data\\_extract.asp](http://unstats.un.org/unsd/cdb/cdb_advanced_data_extract.asp)
